# Supplementary material
Source: publisher site journal article supplement (https://www.dovepress.com/article/supplementary_file/544209/Supplementary%20material_2.docx)
Supplement: Supplementary file 1 [file Supplementary%20material_2.docx]

# Supplementary materials

**Title: A Novel NPR48-Based Model for Early Prediction of Severe Acute Pancreatitis: Development and Multicenter Validation in Comparison with Traditional Clinical Scores**

**Table S1:** Missing data of variables.

| **Variables** | **Available quantity** | **Missing quantity** | **Missing value percentage** |
| --- | --- | --- | --- |
| Age | 343 | 0 | 0 |
| Gender | 343 | 0 | 0 |
| BMI | 266 | 77 | 22.4 |
| Hypertension | 343 | 0 | 0 |
| Diabetes | 343 | 0 | 0 |
| Fatty liver | 343 | 0 | 0 |
| Hyperlipidemia | 343 | 0 | 0 |
| Alcohol | 343 | 0 | 0 |
| Smoking | 343 | 0 | 0 |
| WBC | 343 | 0 | 0 |
| RBC | 343 | 0 | 0 |
| Hb | 343 | 0 | 0 |
| HCT | 343 | 0 | 0 |
| Neut0 | 343 | 0 | 0 |
| Neut48 | 343 | 0 | 0 |
| Ly0 | 343 | 0 | 0 |
| Ly48 | 343 | 0 | 0 |
| Mon0 | 343 | 0 | 0 |
| Mon48 | 343 | 0 | 0 |
| PLT0 | 343 | 0 | 0 |
| PLT48 | 343 | 0 | 0 |
| SII0 | 343 | 0 | 0 |
| SII48 | 343 | 0 | 0 |
| SII48/SII0 | 343 | 0 | 0 |
| NLR0 | 343 | 0 | 0 |
| NLR48 | 343 | 0 | 0 |
| NLR48/NLR0 | 343 | 0 | 0 |
| PLR0 | 343 | 0 | 0 |
| PLR48 | 343 | 0 | 0 |
| PLR48/PLR0 | 343 | 0 | 0 |
| LMR0 | 343 | 0 | 0 |
| LMR48 | 343 | 0 | 0 |
| LMR48/LMR0 | 343 | 0 | 0 |
| NPR0 | 343 | 0 | 0 |
| NPR48 | 343 | 0 | 0 |
| NPR48/NPR0 | 343 | 0 | 0 |
| SIRI0 | 343 | 0 | 0 |
| SIRI48 | 343 | 0 | 0 |
| SIRI48/SIRI0 | 343 | 0 | 0 |
| TBil | 343 | 0 | 0 |
| ALB | 343 | 0 | 0 |
| ALT | 340 | 3 | 0.9 |
| AST | 342 | 1 | 0.3 |
| ALP | 336 | 7 | 2 |
| Glu | 309 | 34 | 9.9 |
| BUN | 342 | 1 | 0.3 |
| SCr | 342 | 1 | 0.3 |
| K+ | 342 | 1 | 0.3 |
| Na+ | 342 | 1 | 0.3 |
| Cl- | 342 | 1 | 0.3 |
| Ca2+ | 330 | 13 | 3.8 |
| TC | 331 | 12 | 3.5 |
| TG | 331 | 12 | 3.5 |
| HDL | 329 | 14 | 4.1 |
| LDL | 329 | 14 | 4.1 |
| PT | 320 | 23 | 6.7 |
| APTT | 320 | 23 | 6.7 |
| INR | 320 | 23 | 6.7 |

**Abbreviations:** BMI, body mass index; WBC, white blood cell; RBC, red blood cell; Hb, hemoglobin; HCT, hematocrit; Neut, neutrophil count; Neut0, Neut at admission; Neut48, Neut at 48 h; Ly, lymphocyte count; Ly0, Lyat admission; Ly48, Ly at 48 h; Mon, monocyte count; Mon0, Mon at admission; Mon48, Mon at 48 h; PLT, platelet count; PLT0, PLT at admission; PLT48, PLT at 48 h; SII, systemic immune-inflammation index; SII0, SII at admission; SII48, SII at 48 h; SII48/SII0, SII48 to SII0 ratio; NLR, neutrophil to lymphocyte ratio; NLR0, NLR at admission; NLR48, NLR at 48 h; NLR48/NLR0, NLR48 to NLR0 ratio; PLR, platelet to lymphocyte ratio; PLR0, PLR at admission; PLR48, PLR at 48 h; PLR48/PLR0, PLR48 to PLR0 ratio; LMR, lymphocyte to monocyte ratio; LMR0, LMR at admission; LMR48, LMR at 48 h; LMR48/LMR0, LMR48 to LMR0 ratio; NPR, neutrophil to platelet ratio; NPR0, NPR at admission; NPR48, NPR at 48 h; NPR48/NPR0, NPR48 to NPR0 ratio; SIRI, systemic inflammatory response index; SIRI0, SIRI at admission; SIRI48, SIRI at 48 h; SIRI48/SIRI0, SIRI48 to SIRI0 ratio; TBil, total bilirubin; ALB, serum albumin; ALT, alanine aminotransferase; AST, aspartate transaminase; ALP, alkaline phosphatase; Glu, glucose; BUN, blood urea nitrogen; SCr, serum creatinine; K+, serum potassium; Na+, serum sodium; Cl-, serum chlorine; Ca2+, serum calcium; TC, total cholesterol; TG, triglyceride; HDL, high-density lipoprotein cholesterol; LDL, low-density lipoprotein cholesterol; PT, prothrombin time; APTT, activated partial thromboplastin time; INR, international normalized ratio.

**Table S2:** Multivariate logistic regression analysis of the predictors of SAP (N=306)

| **Variables** | **β** | **SE** | **Z value** | **Prediction Model** | | |
| --- | --- | --- | --- | --- | --- | --- |
|  |  |  |  | **P-value** | **OR** | **95% CI** |
| Hb | 0.020 | 0.008 | 2.372 | 0.018 | 1.020 | 1.003–1.037 |
| BUN | 0.255 | 0.073 | 3.509 | <0.001 | 1.290 | 1.119–1.487 |
| Ca2+ | -4.747 | 0.762 | -6.229 | <0.001 | 0.009 | 0.002–0.039 |
| PT | 0.561 | 0.177 | 3.179 | 0.001 | 1.753 | 1.240–2.478 |
| NPR48 | 0.011 | 0.006 | 1.824 | 0.068 | 1.011 | 0.999–1.023 |

**Abbreviations:** SAP, severe acute pancreatitis; β, regression coefficient; SE, standard error; OR, odds ratio; CI, confidence interval; Hb, hemoglobin; BUN, blood urea nitrogen; Ca2+, serum calcium; PT, prothrombin time; NPR, neutrophil to platelet ratio; NPR48, NPR at 48 h.

**
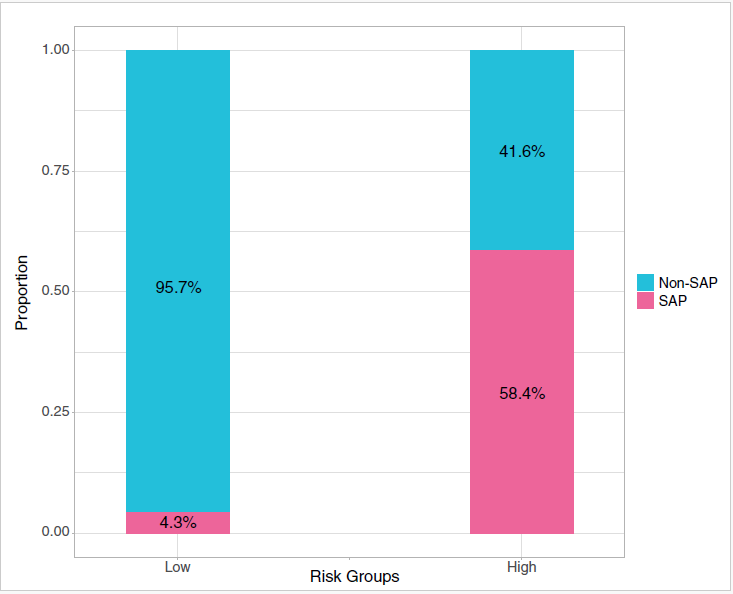
**

**Figure S1:** The incidence of SAP in the low-risk group and the high-risk group.

**Abbreviations:** SAP, severe acute pancreatitis.
